# Supplementary material for: Development of a dual antigen lateral flow immunoassay for detecting Yersinia pestis
Source: PLOS journal article supplement (doi:10.1371/journal.pntd.0010287), 2022-03-23
Supplement: S5 (10.1371/journal.pntd.0010287.s005) [file journal.pntd.0010287.s005]

(A)

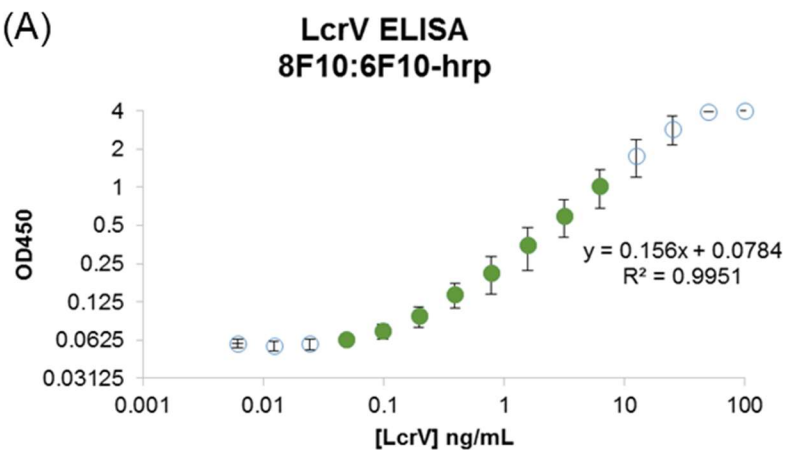

(B)

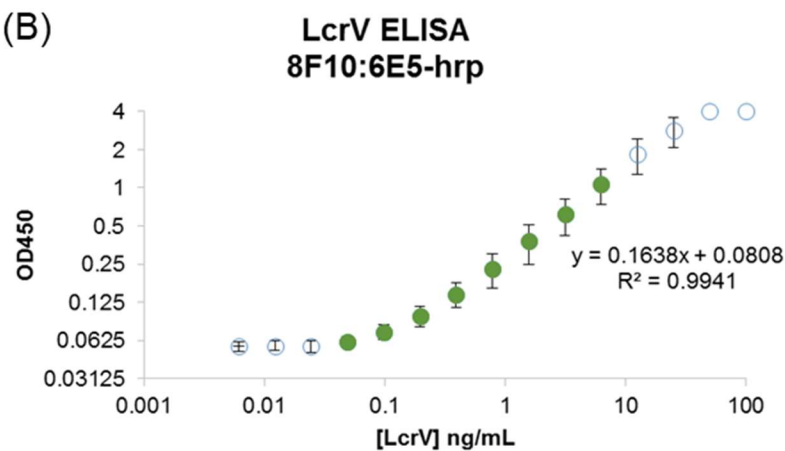

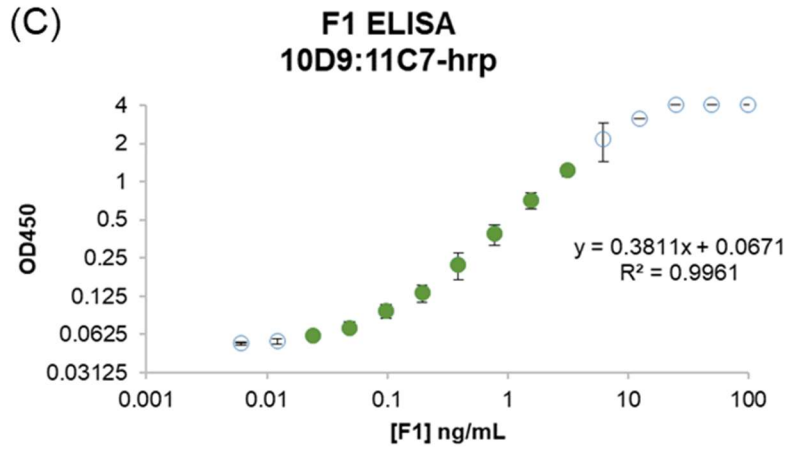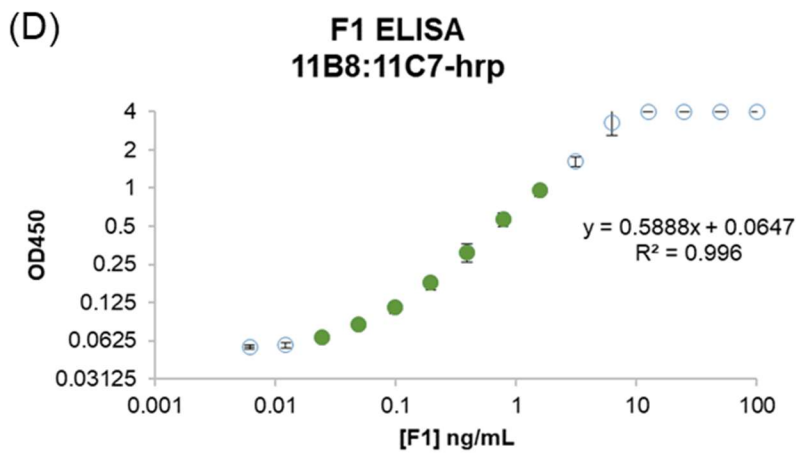

**S5 Fig.** Antigen-capture ELISAs were performed to determine the limits of detection (LOD) for recombinant **(A)** LcrV and **(B)** F1. Values were calculated as the concentration of recombinant protein in ng/ml at five times background. The values represent means of two independent ELISAs (each performed in biological triplicates).
